# Supplementary material for: Sublethal heat treatment enhances lactic acid uptake in macrophages via MCT1, leading to reduced paraspeckle formation and a subsequent decrease in macrophage pyroptosis
Source: Front Immunol. 2024 Jan 11;14:1290185. doi: 10.3389/fimmu.2023.1290185 (PMC10808517; doi:10.3389/fimmu.2023.1290185)
Supplement: Supplementary file 1 [file Table_1.xlsx]

## Sheet: Sheet1
M3						1	2	3
SLHT					Control	7.71	7.65	7.72
					SLHT	7.13	7.23	7.18
